# Supplementary material for: Self-carbonization synthesis of highly-bright red/near-infrared carbon dots by solvent-free method
Source: Royal Society of Chemistry journal article supplement (doi:10.1039/d1tc05782k), 2022-01-01
Supplement: d1tc05782k1.pdf [file d1tc05782k1.pdf]

| Sample | N(%)  | C(%)  | H(%) | S(%) |
|--------|-------|-------|------|------|
| 1      | 20.10 | 70.45 | 4.55 | 4.90 |
| 1.1    | 19.98 | 70.12 | 4.35 | 5.55 |

Table S1: The elemental analysis results of R-CDs-2

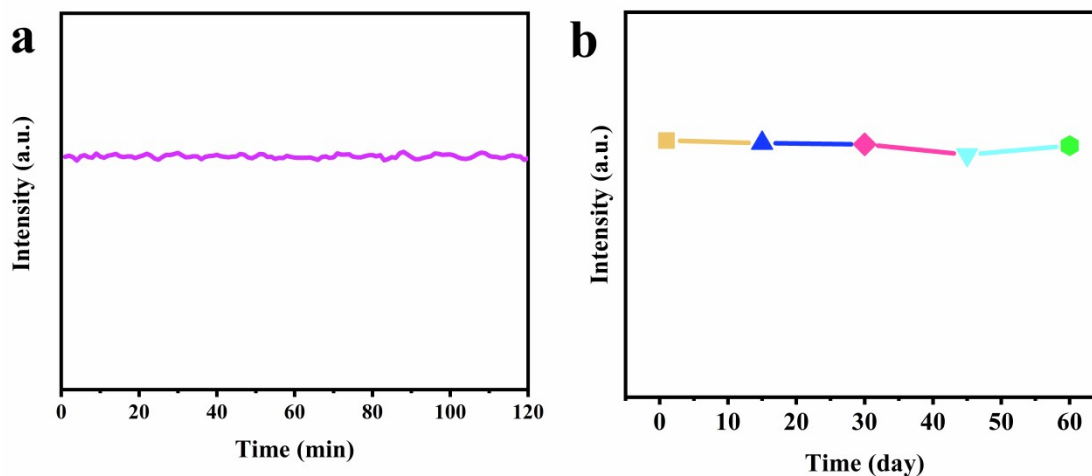

Fig.S1: The changes in fluorescence intensity of the prepared R-CDs-2 upon continuous UV irradiation for 120 min or visible light irradiation for 2 months.

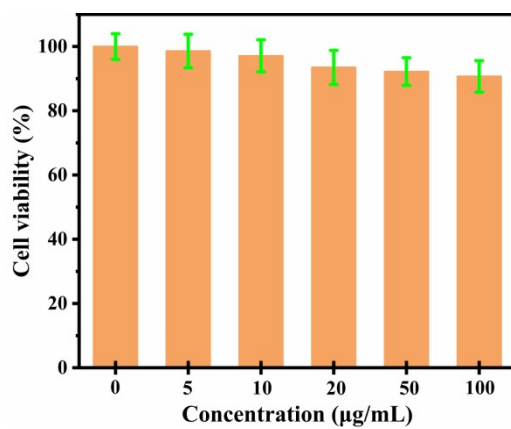

Fig.S2: Survival of hela cells at different concentrations of R-CDs-2.
